# Supplementary material
Source: publisher figshare collection journal article supplement (https://gsajournals.figshare.com/ndownloader/files/17907263)
Supplement: Supplementary file 1 [file 17907263]

## Sheet: Table S3
Table S3. Details of significant markers associated with 35 traits in 143 diverse wheat accessions grown in two seasons (2017 and 2018) in Siberia.
Year	Trait	SNP	PVE	Favorable allele	SNP effect	P-value	QTL reported on literature
2018	Circularity	S1B_53724967	8.15	C	0.01	9.37148e-07	Novel
2018	Circularity	S2B_584120704	5.46	G	-0.01	3.87441e-08	Novel
2018	Circularity	S4B_64816370	8.2	C	0.01	4.18651e-09	Novel
2018	Circularity	S5A_6179472	5.25	G	0.01	9.84688e-08	Novel
2018	Emergence	S3B_498344410	7.34	G	-14.08	7.72206e-07	Novel
2018	Emergence	S6B_190376868	8.88	A	12.4	3.13273e-08	Novel
2017	Gluten content	S2A_750550946	7.72	T	1.21	3.8585e-09	Novel
2017	Gluten content	S3B_335231956	3.59	A	-1.13	4.80137e-08	Liu et al. 2016b
2018	Gluten content	S5A_471711779	6.98	A	-1.44	9.85476e-07	Novel
2018	Gluten content	S5A_471711808	6.98	C	-1.44	9.85476e-07	Novel
2017	Gluten content	S5B_438017153	12.43	T	1.19	2.66543e-10	Novel
2017	Gluten content	S5B_8944420	8.13	G	-0.78	1.00867e-06	Novel
2017	Gluten content	S7D_394942944	1.89	C	-1.15	7.66033e-07	Li et al. 2013
2018	Grain area	S1D_32503946	6.97	T	0.77	1.00826e-08	Novel
2018	Grain area	S1D_38776282	1.55	C	0.36	5.40183e-07	Novel
2018	Grain area	S2A_734585818	10.41	T	1.12	1.86535e-10	Campbell et al. 1999
2017	Grain area	S3A_422328568	5.57	T	0.71	4.28942e-08	Novel
2017	Grain area	S3A_659518524	14.22	T	0.8	9.1423e-08	Novel
2018	Grain area	S4A_732725628	10.98	A	-1.18	1.90829e-14	Xiao et al. 2011
2017	Grain length	S1D_24724890	7.83	A	-0.16	8.2525e-10	Xiao et al. 2011
2018	Grain length	S2A_6269139	3.18	G	-0.1	1.97416e-07	Xiao et al. 2011
2018	Grain length	S2A_734585818	14.03	T	0.37	4.23109e-15	Xiao et al. 2012
2018	Grain length	S3A_307153492	9.59	C	-0.23	1.50496e-09	Novel
2017	Grain length	S3A_495499647	6.61	A	-0.14	1.21381e-08	Novel
2018	Grain length	S4B_14268046	6.1	G	0.19	3.91779e-08	Breseghello and Sorrells 2007; Sun et al. 2008b; Xiao et al. 2011
2017	Grain length	S4B_64816370	11.46	T	-0.23	4.46355e-08	Breseghello and Sorrells 2007; Sun et al. 2008b; Xiao et al. 2011
2018	Grain length	S5B_399398211	8.94	G	0.18	8.53308e-07	Dholakia et al. 2003; Breseghello and Sorrells 2007; Xiao et al. 2011
2018	Grain length	S6D_470516697	4.27	A	-0.17	2.20786e-08	Novel
2018	Grain length	S7A_668309875	10.15	A	0.17	4.17937e-11	Xiao et al. 2011
2018	Grain length	S7B_653444351	1.88	C	-0.1	2.09348e-07	Dholakia et al. 2003
2017	Grain perimeter	S2A_24003058	5.72	G	0.33	6.77266e-07	Xiao et al. 2011
2018	Grain perimeter	S2A_734585818	6.36	T	0.55	3.51214e-10	Xiao et al. 2011
2017	Grain perimeter	S2B_771414440	5.56	G	0.25	7.56819e-07	Xiao et al. 2011
2018	Grain perimeter	S3A_733469510	3.45	T	0.18	1.12999e-07	Novel
2018	Grain perimeter	S4A_732725628	9.93	A	-0.46	3.6143e-10	Novel
2018	Grain perimeter	S5B_399398211	6.92	G	0.5	4.01216e-10	Xiao et al. 2011
2017	Grain weight plant	S1B_29205666	19.6	A	-0.29	9.28391e-08	Novel
2017	Grain weight plant	S2A_57829714	8.64	C	-0.16	6.11131e-07	Novel
2017	Grain weight plant	S3B_221532349	8.64	G	0.14	8.26071e-07	Novel
2017	Grain weight spike	S1B_453188672	4.16	T	0.06	1.19319e-07	Bhusal et al. 2017
2018	Grain weight spike	S1B_457535596	5.27	T	0.07	2.60197e-08	Bhusal et al. 2017
2017	Grain weight spike	S2A_718230521	2.12	A	-0.12	8.66726e-08	Bhusal et al. 2017
2017	Grain weight spike	S4A_656103460	0.3	C	-0.08	6.8955e-08	Guan et al. 2018
2018	Grain weight spike	S7A_675060149	5.9	A	-0.09	1.43028e-08	Guan et al. 2018
2018	Grain weight spike	S7D_385718003	9.27	T	0.07	6.96762e-08	Novel
2018	Grain yield	S3A_572390836	6.28	A	-54.86	3.00221e-07	Neumann et al. 2011; Bordes et al. 2014; Hoffstetter et al. 2016; Sehgal et al. 2017; Bhatta et al. 2018b
2017	Grain yield	S3D_12828956	4.73	G	21.54	5.34759e-07	Bordes et al. 2014; Bhatta et al. 2018b
2017	Grain yield	S5B_28753553	2.46	G	24.43	5.78181e-07	Pinto et al. 2010; Neumann et al. 2011; Bordes et al. 2014; Edae et al. 2014; Sukumaran et al. 2015
2017	Grain yield	S6D_8489693	7	C	-42.88	2.30507e-07	Bhusal et al. 2017
2017	Grain yield	S7D_581411783	7.97	G	32.43	5.36052e-07	Novel
2018	Grains per spike	S4D_457523184	10.36	G	-1.99	3.95674e-10	Zhang et al. 2010
2018	Grains per spike	S5D_198466085	9.5	G	2.24	4.42064e-08	Liu et al. 2006; Zhang et al. 2010
2017	Harvest index	S1B_328813768	9.46	A	-0.03	6.19069e-07	Acuña-Galindo et al. 2015; Sukumaran et al. 2015
2018	Harvest index	S4B_597985902	9.08	A	-0.01	6.64647e-07	Novel
2018	Harvest index	S5A_457925029	9.04	A	-0.01	1.35025e-07	Acuña-Galindo et al. 2015
2017	Harvest index	S5A_584618691	11.25	C	0.04	2.31005e-07	Acuña-Galindo et al. 2015
2017	Harvest index	S5A_584712144	6.35	C	-0.03	8.41916e-07	Acuña-Galindo et al. 2015
2017	Harvest index	S5A_586600382	7.44	G	-0.03	7.74715e-07	Acuña-Galindo et al. 2015
2018	Harvest index	S5A_698003176	8.11	T	0.01	1.0459e-06	Acuña-Galindo et al. 2015
2018	Harvest index	S6A_595332862	6.41	G	0.01	6.70145e-09	Golabadi et al. 2011; Assanga et al. 2017
2018	Harvest index	S7A_30243478	4.14	G	0.01	8.34575e-07	Acuña-Galindo et al. 2015
2018	Harvest index	S7B_530381515	5.39	G	0.03	3.99842e-13	Golabadi et al. 2011; Neumann et al. 2011; Bhatta et al. 2018b
2018	Harvest index	S7D_12460271	6.48	G	0.02	6.39916e-08	Novel
2018	Harvest index	S7D_385718003	4.15	T	0.01	5.53645e-08	Novel
2017	Heading date	S1D_391967356	5.8	A	1.86	1.59527e-07	Novel
2018	Heading date	S2B_680331940	2.68	A	2.18	2.6162e-08	Novel
2017	Heading date	S2B_760862872	5	G	-3.85	1.19868e-11	Novel
2017	Heading date	S4A_691718543	8	T	-1.87	1.86308e-08	Novel
2018	Heading date	S5A_510255741	7.73	T	-0.84	6.52591e-08	Chu et al. 2008; Sukumaran et al. 2015
2018	Heading date	S5A_549160106	13.14	T	-2.13	1.46993e-09	Chu et al. 2008; Sukumaran et al. 2015
2018	Heading date	S5A_584618691	12.3	A	-1.08	2.15397e-07	Chu et al. 2008; Sukumaran et al. 2015
2018	Heading date	S5D_494053024	4.33	C	-1.11	5.62012e-07	Novel
2018	Heading date	S7A_93033563	11.61	C	1.69	1.29223e-08	Novel
2017	Leaf number	S1B_15099360	11.42	C	-0.18	2.63034e-13	Novel
2017	Leaf number	S1B_411990571	6.97	G	0.16	1.9137e-07	Novel
2017	Leaf number	S3B_85623433	4.7	A	-0.22	7.11162e-08	Novel
2018	Leaf number	S4D_455836980	13.03	C	-0.13	1.02022e-06	Novel
2017	Leaf rust	S1D_6789756	9.35	A	6.04	6.81774e-10	Rosewarne et al. 2012; McIntosh et al. 2014; Kertho et al. 2015; Jighly et al. 2016
2018	Leaf rust	S2A_21457330	5.06	T	-10.04	7.30183e-11	Rosewarne et al. 2012; McIntosh et al. 2014; Kertho et al. 2015; Jighly et al. 2016
2017	Leaf rust	S2A_35877256	2.67	C	-4	2.24695e-07	Rosewarne et al. 2012; McIntosh et al. 2014; Kertho et al. 2015; Jighly et al. 2016
2017	Leaf rust	S2B_31382175	2.38	A	5.19	1.69956e-11	Rosewarne et al. 2012; McIntosh et al. 2014; Kertho et al. 2015; Jighly et al. 2016
2018	Leaf rust	S3A_50747630	5.68	G	-11.16	1.17987e-09	Rosewarne et al. 2012; McIntosh et al. 2014; Kertho et al. 2015; Jighly et al. 2016
2017	Leaf rust	S3B_36628392	1.72	G	-7.58	2.11842e-08	Rosewarne et al. 2012; McIntosh et al. 2014; Kertho et al. 2015; Jighly et al. 2016
2018	Leaf rust	S3D_249430919	5.74	G	-18.85	4.10026e-11	Rosewarne et al. 2012; McIntosh et al. 2014; Kertho et al. 2015; Jighly et al. 2016
2017	Leaf rust	S4A_732004686	5.66	C	8.24	1.73242e-07	Rosewarne et al. 2012; McIntosh et al. 2014; Kertho et al. 2015; Jighly et al. 2016
2017	Leaf rust	S4D_150479219	9.21	A	4.3	1.00475e-07	Rosewarne et al. 2012; McIntosh et al. 2014; Kertho et al. 2015; Jighly et al. 2016
2018	Leaf rust	S5A_32764633	4.92	A	16.13	6.91009e-08	Rosewarne et al. 2012; McIntosh et al. 2014; Kertho et al. 2015; Jighly et al. 2016
2017	Leaf rust	S6B_501107290	8.21	C	7.46	3.42429e-12	Rosewarne et al. 2012; McIntosh et al. 2014; Kertho et al. 2015; Jighly et al. 2016
2018	Leaf rust	S7A_670904777	4.4	G	10.24	3.2431e-09	Rosewarne et al. 2012; McIntosh et al. 2014; Kertho et al. 2015; Jighly et al. 2016
2018	Leaf rust AUDPC	S1A_510452847	5.08	G	-245.92	1.06752e-06	Novel
2018	Leaf rust AUDPC	S1B_560253737	14.05	G	-332.22	1.18363e-13	Schnurbusch et al. 2004
2017	Leaf rust AUDPC	S1D_6226490	5.86	G	-121.13	2.58241e-07	Novel
2017	Leaf rust AUDPC	S3B_36628392	2.16	G	-137.81	2.74417e-07	Lu et al. 2017
2017	Leaf rust AUDPC	S5A_574195229	3.72	A	125.56	7.21057e-07	Novel
2017	Leaf rust AUDPC	S6A_610211705	10.82	T	-98.28	5.22056e-08	Novel
2017	Leaf rust AUDPC	S6B_501107290	6.1	C	125.57	5.88576e-08	Novel
2018	Leaf rust AUDPC	S6D_83156449	6.9	A	209.72	2.55792e-07	Novel
2018	Number of plants	S1A_440183259	4.56	C	-3.4	6.05087e-07	Novel
2018	Number of plants	S1D_307421004	11.54	G	7.2	1.954e-11	Novel
2018	Number of plants	S6D_470516691	5.81	A	-2.34	3.87024e-10	Novel
2017	Number of plants	S7A_100624533	12.33	T	8.59	2.2562e-07	Novel
2017	Number of plants	S7A_100624536	12.33	G	8.59	2.2562e-07	Novel
2017	Number of plants	S7A_100624582	12.33	G	8.59	2.2562e-07	Novel
2017	Number of plants	S7D_75136077	10.07	A	-8.81	9.15855e-07	Novel
2017	Number of plants	S7D_75136112	10.07	A	-8.81	9.15855e-07	Novel
2017	Number of plants	S7D_75357650	11.01	A	-8.81	9.15855e-07	Novel
2017	Number of plants	S7D_95102953	10.82	T	8.81	9.15855e-07	Novel
2018	Number of productive tillers	S1A_44980981	11.81	C	-0.13	1.52558e-08	Novel
2018	Number of productive tillers	S2B_765035168	12.01	C	-0.15	1.06465e-11	Novel
2018	Number of productive tillers	S2D_10070953	2.37	T	0.08	3.82381e-08	Novel
2018	Number of productive tillers	S2D_579472210	8.16	T	0.06	8.76873e-08	Novel
2018	Number of productive tillers	S3D_282956863	1.88	G	0.06	1.7473e-08	Novel
2018	Number of productive tillers	S5A_354894125	12.26	C	-0.05	7.30114e-07	Novel
2018	Number of productive tillers	S5B_310794551	5.75	G	0.09	5.48541e-08	Novel
2018	Number of spikes	S1A_440183259	7.12	C	-6.96	5.58016e-07	Novel
2018	Number of spikes	S3A_650197388	7.86	T	3.68	1.0668e-06	Novel
2018	Number of spikes	S3D_385387350	8.5	G	11.08	1.00811e-07	Liu et al. 2006
2018	Number of spikes	S6D_104966449	5.72	G	7.8	5.23437e-08	Novel
2017	Number of spikes	S7A_100624533	9.99	T	12.94	9.03276e-07	Guan et al. 2018
2017	Number of spikes	S7A_100624536	9.99	G	12.94	9.03276e-07	Guan et al. 2018
2017	Number of spikes	S7A_100624582	9.99	G	12.94	9.03276e-07	Guan et al. 2018
2017	Number of spikes	S7A_113458166	11.49	A	-18.6	6.17788e-07	Guan et al. 2018
2018	Peduncle length	S1D_456199885	7.39	A	3.58	2.13089e-07	Novel
2017	Peduncle length	S2B_13271827	1.14	G	-1.44	1.41947e-07	Novel
2018	Peduncle length	S4A_732825683	8.81	G	-4.71	1.38307e-07	Novel
2017	Peduncle length	S4B_13990601	9.95	C	1.85	4.04417e-08	Novel
2017	Peduncle length	S6B_715980886	4.33	T	-1.62	1.24299e-07	Novel
2017	Peduncle length	S7A_57322841	4.07	C	-1.4	4.94045e-07	Novel
2017	Peduncle length	S7A_636900050	2.68	C	1.17	2.62124e-07	Novel
2017	Peduncle length	S7B_595077876	8.69	T	-2.74	1.4904e-12	Novel
2017	Plant height	S1B_592980154	9.66	A	4.37	2.42363e-07	Chu et al. 2008; Guan et al. 2018
2018	Plant height	S1D_457219860	8	C	-3.08	1.90099e-08	Novel
2017	Plant height	S3A_691450972	1.2	A	3.69	5.33518e-07	Chu et al. 2008; Guan et al. 2018
2017	Plant height	S4A_732825683	10.44	G	-4.74	1.45703e-08	Novel
2017	Plant height	S5A_584712144	12.58	C	5.02	8.30484e-15	Chu et al. 2008; Guan et al. 2018
2018	Plant weight with roots	S1B_453188672	5.78	T	0.25	1.82102e-07	Novel
2018	Plant weight with roots	S1B_481542978	8.79	A	-0.47	2.40846e-09	Novel
2018	Plant weight with roots	S1D_10398574	7.92	G	0.3	2.18313e-07	Novel
2017	Plant weight with roots	S2D_22339914	17.12	C	-0.87	8.93233e-14	Novel
2017	Plant weight with roots	S3A_737554024	11.62	G	0.37	2.60941e-07	Novel
2018	Plant weight with roots	S3B_246145297	5.87	A	-0.2	9.01689e-07	Novel
2018	Plant weight with roots	S3B_25180892	4.6	A	-0.22	3.1795e-07	Novel
2017	Plant weight with roots	S5A_584618691	8.99	C	-0.78	6.36613e-11	Novel
2018	Plant weight with roots	S5B_426587161	8.78	G	0.43	1.28657e-07	Novel
2017	Powedery mildew	S2B_81993637	3.55	A	0.82	3.20421e-07	Liu et al. 2001; Mingeot et al. 2002; Bougot et al. 2006; Bai et al. 2012
2017	Powedery mildew	S2D_130728324	9.85	C	1.23	1.99091e-09	Bougot et al. 2006; Bai et al. 2012
2017	Powedery mildew	S3A_568974346	3.74	C	-0.43	3.51555e-07	Novel
2017	Powedery mildew	S4A_708680733	10.11	C	0.67	5.71096e-07	Mingeot et al. 2002; Bougot et al. 2006; Chen et al. 2009
2017	Powedery mildew	S5B_631643964	11.09	G	-0.46	5.04171e-08	Bougot et al. 2006; Liu et al. 2017
2017	Powedery mildew	S6D_5824400	12.55	C	1.2	2.85078e-11	Chen et al. 2009
2018	Powedery mildew	S6D_5824400	9.85	C	0.86	4.42608e-07	Chen et al. 2009
2017	Protein content	S1A_444168255	2.06	G	0.69	1.06417e-08	Li et al. 2013
2017	Protein content	S1D_6719537	6.1	T	0.39	2.51065e-09	Pushpendra et al. 2007; Li et al. 2013
2017	Protein content	S2A_750550946	5.35	T	0.55	1.12467e-08	Pushpendra et al. 2007; Li et al. 2013
2017	Protein content	S2D_323648225	1.85	G	0.44	2.03823e-08	Pushpendra et al. 2007
2017	Protein content	S2D_643258624	6.8	C	-0.81	1.55876e-09	Pushpendra et al. 2007
2017	Protein content	S3A_731550097	7.83	A	-0.67	2.01203e-07	Pushpendra et al. 2007
2018	Protein content	S3B_17974304	8.5	T	0.32	6.54515e-08	Sun et al. 2008a; Heo and Sherman 2013
2017	Protein content	S4A_11986495	4.43	G	0.25	3.61002e-07	Pushpendra et al. 2007; Li et al. 2013
2017	Protein content	S5B_684230407	13.88	A	-0.63	1.27573e-10	Heo and Sherman 2013
2017	Root diameter	S4A_140700711	8.1	C	0.02	2.03968e-07	Novel
2017	Root diameter	S5D_494053024	11.15	G	-0.05	1.93953e-11	Novel
2017	Root diameter	S6A_13685903	13.65	C	-0.22	5.04868e-10	Novel
2017	Root volume	S2D_506778844	9.22	G	-0.24	7.86575e-14	Novel
2017	Root volume	S3B_25372664	8.38	T	0.13	3.88909e-07	Novel
2017	Root volume	S3B_814148012	8.87	G	0.15	1.1534e-10	Novel
2017	Root volume	S4D_498573207	0.3	C	-0.16	1.65886e-10	Novel
2017	Root volume	S5A_578837330	4.82	G	0.16	5.65602e-07	Maccaferri et al. 2016
2017	Root volume	S7A_51567055	0.3	T	-0.12	2.88478e-07	Maccaferri et al. 2016
2017	Root volume	S7D_27486623	2.11	A	-0.15	2.40915e-09	Novel
2017	Root volume	S7D_78215549	5.07	C	-0.26	1.16445e-14	Novel
2018	Septoria	S1B_671235894	5.96	T	-0.49	3.10973e-08	Chartrain et al. 2005; Tabib Ghaffary et al. 2011
2018	Septoria	S2D_139111176	3.35	G	-0.34	1.13045e-08	Simón et al. 2004; Tabib Ghaffary et al. 2011
2018	Septoria	S7B_643501119	6.48	A	0.62	3.1449e-11	Simón et al. 2004
2017	Spike density	S3B_770476311	12.33	C	-1.63	2.72546e-07	Novel
2017	Spike density	S3B_770476326	12.33	G	1.63	2.72548e-07	Novel
2017	Spike density	S3B_770476333	12.33	C	-1.63	2.72546e-07	Novel
2017	Spike harvest index	S1A_514041459	20.59	G	0.06	1.37429e-08	Novel
2018	Spike harvest index	S2D_405601286	8.02	A	-0.02	9.36438e-10	Novel
2018	Spike harvest index	S3A_274890899	9.3	T	0.03	4.93122e-08	Novel
2018	Spike harvest index	S3A_523055392	6.77	G	0.02	1.69531e-10	Novel
2017	Spike harvest index	S3B_754948481	8.09	G	0.02	1.17083e-07	Golabadi et al. 2011
2017	Spike harvest index	S6D_11346440	3.88	C	-0.03	4.0319e-07	Novel
2018	Spike harvest index	S7A_706764955	2.43	C	-0.01	5.48128e-09	Golabadi et al. 2011
2017	Spike harvest index	S7A_83275301	7.18	T	0.02	1.97488e-08	Golabadi et al. 2011
2017	Spike length	S1B_591225142	3.59	A	-0.4	1.77709e-09	Li et al. 2002
2018	Spike length	S2B_651360266	5	T	0.22	2.46187e-07	Novel
2018	Spike length	S2B_744869741	7.35	C	-0.26	2.0387e-07	Novel
2018	Spike length	S3B_246146527	6.81	T	0.4	1.67701e-07	Novel
2018	Spike length	S3D_600173740	6.6	C	-0.38	6.74242e-14	Chu et al. 2008
2017	Spike length	S4B_197213346	5.58	T	0.26	9.1439e-07	Liu et al. 2006
2018	Spike length	S6A_16407205	3.51	C	-0.25	5.35082e-07	Novel
2017	Spike length	S6B_158074944	17.21	A	-0.34	9.28803e-08	Novel
2018	Spike length	S6B_4874543	9.54	A	-0.43	3.81509e-08	Novel
2017	Spike length	S7B_638491985	4.95	T	0.24	8.72605e-07	Novel
2018	Spike weight	S1B_457535596	6.78	T	0.15	6.87064e-07	Golabadi et al. 2011; Acuña-Galindo et al. 2015
2017	Spike weight	S2D_100431648	12.27	G	0.22	3.5874e-16	Novel
2018	Spike weight	S4D_455763126	6.04	A	-0.15	3.7907e-07	Novel
2017	Spike weight	S5B_487919184	7.45	G	0.1	2.65873e-10	Acuña-Galindo et al. 2015
2017	Spike weight	S5D_11007150	4.25	C	-0.14	3.83777e-08	Novel
2017	Spike weight	S7A_606181588	2.58	G	-0.16	1.37361e-07	Novel
2017	Spike weight	S7B_700568702	7.2	G	0.09	6.43404e-07	Golabadi et al. 2011
2017	Spikelet number	S1B_336787649	4.11	G	0.42	2.59661e-08	Novel
2018	Spikelet number	S1B_617281015	13.44	G	0.72	4.64179e-11	Novel
2018	Spikelet number	S3B_372895173	4.51	C	0.25	3.2948e-07	Novel
2018	Spikelet number	S3B_610752596	11.61	G	0.44	7.98864e-11	Novel
2017	Spikelet number	S3B_807353230	11.7	C	-0.88	2.80188e-08	Novel
2017	Spikelet number	S4D_3725137	1.92	C	-0.68	2.26302e-08	Chu et al. 2008
2018	Spikelet number	S5A_544738352	2.33	C	-0.37	3.27333e-09	Li et al. 2002
2018	Spikelet number	S6B_41908391	7.56	A	-0.64	5.1584e-11	Novel
2017	Spikelet number	S6B_689978923	3.06	C	1.39	5.47043e-07	Novel
2018	Spikelet number	S7A_670904777	4.68	G	0.38	1.69927e-08	Li et al. 2002
2017	Spikelet number	S7A_85601215	5.91	C	-0.38	1.13661e-09	Li et al. 2002
2017	Spikelet number	S7B_237933969	5.33	T	0.48	5.41176e-07	Novel
2018	Stem rust	S1A_1236314	7.01	T	-15.36	1.18588e-11	McIntosh et al. 2014
2017	Stem rust	S1B_171106090	4.65	C	6.87	1.77806e-08	McIntosh et al. 2014
2018	Stem rust	S5A_702172467	8.84	A	10.64	2.24399e-13	McIntosh et al. 2014
2018	Stem rust	S7A_477184977	6.87	C	-10.27	7.37559e-09	McIntosh et al. 2014
2017	Stem rust	S7D_29550951	0.95	G	-4.82	6.5856e-07	McIntosh et al. 2014
2018	Stem rust AUDPC	S1D_116007310	7.2	T	-289.94	5.57975e-11	Novel
2017	Stem rust AUDPC	S3B_694929945	4.73	G	-66.03	3.16734e-08	Novel
2018	Stem rust AUDPC	S5A_471711779	5.86	A	166.41	6.02474e-07	Novel
2017	Stem rust AUDPC	S7A_670504539	7.95	T	-228.68	3.50852e-07	Novel
2017	Stem rust AUDPC	S7A_736523425	11.29	G	-187.77	8.21896e-13	Novel
2017	Stem rust AUDPC	S7D_29550951	1.07	G	-115.16	4.00196e-09	Novel
2018	Stem rust AUDPC	S7D_29550951	9.75	G	-191.09	1.72407e-08	Novel
2018	Thousand kernel weight	S3B_6085798	5.75	A	-1.07	5.31926e-08	Golabadi et al. 2011; Sukumaran et al. 2018; Bhatta et al. 2018b
2018	Thousand kernel weight	S3D_20544367	8.57	C	-2.33	9.49208e-09	Liu et al. 2018
2018	Thousand kernel weight	S4A_732725628	11.46	A	-2.21	1.17715e-08	Bhatta et al. 2018b
2017	Thousand kernel weight	S4A_732825683	10.83	T	-2.22	6.43167e-08	Bhatta et al. 2018b
2017	Thousand kernel weight	S4B_149938884	2.77	T	4.07	6.52456e-07	Pinto et al. 2010; Bhatta et al. 2018b
2017	Thousand kernel weight	S5A_597279906	5.02	G	4.25	6.31424e-07	Sukumaran et al. 2015; Guan et al. 2018
2017	Thousand kernel weight	S5D_498302498	16.46	G	-4.37	1.55487e-11	Liu et al. 2018
2017	Thousand kernel weight	S6A_25317058	11.69	T	1.56	4.95107e-08	Sukumaran et al. 2015; Guan et al. 2018
2018	Thousand kernel weight	S6A_26974912	10.36	C	-1.32	9.24882e-09	Sukumaran et al. 2015; Guan et al. 2018
2017	Thousand kernel weight	S6B_715630919	6.08	A	-1.26	3.28945e-08	Assanga et al. 2017
2017	Total root length	S2D_506778844	16.79	G	-31.41	1.71558e-10	Novel
2017	Total root length	S3B_814148012	10.14	G	19.81	3.68623e-07	Maccaferri et al. 2016; Bhatta et al. 2018b
2018	Total root length	S5A_584618691	9.41	A	-12.9	2.91242e-07	Maccaferri et al. 2016
2018	Total root length	S6B_6007687	15.9	G	13.57	2.31593e-07	Maccaferri et al. 2016
2018	Total root length	S6B_6007694	15.9	G	13.57	2.31593e-07	Maccaferri et al. 2016
2018	Total root length	S7A_710883775	10.41	A	-16.98	7.99862e-07	Maccaferri et al. 2016; Bhatta et al. 2018b
2017	Total root length	S7B_744277998	25.02	C	-106.91	7.52959e-12	Maccaferri et al. 2016
